# Supplementary material for: Structure-activity assessment of flavonoids as modulators of copper transport
Source: PubMed Central journal article supplement (PMC9445161; doi:10.3389/fchem.2022.972198), 2022-08-23
Supplement: DataSheet1.pdf [file DataSheet1.pdf]

# Supplementary Information

## SI Figure 1.

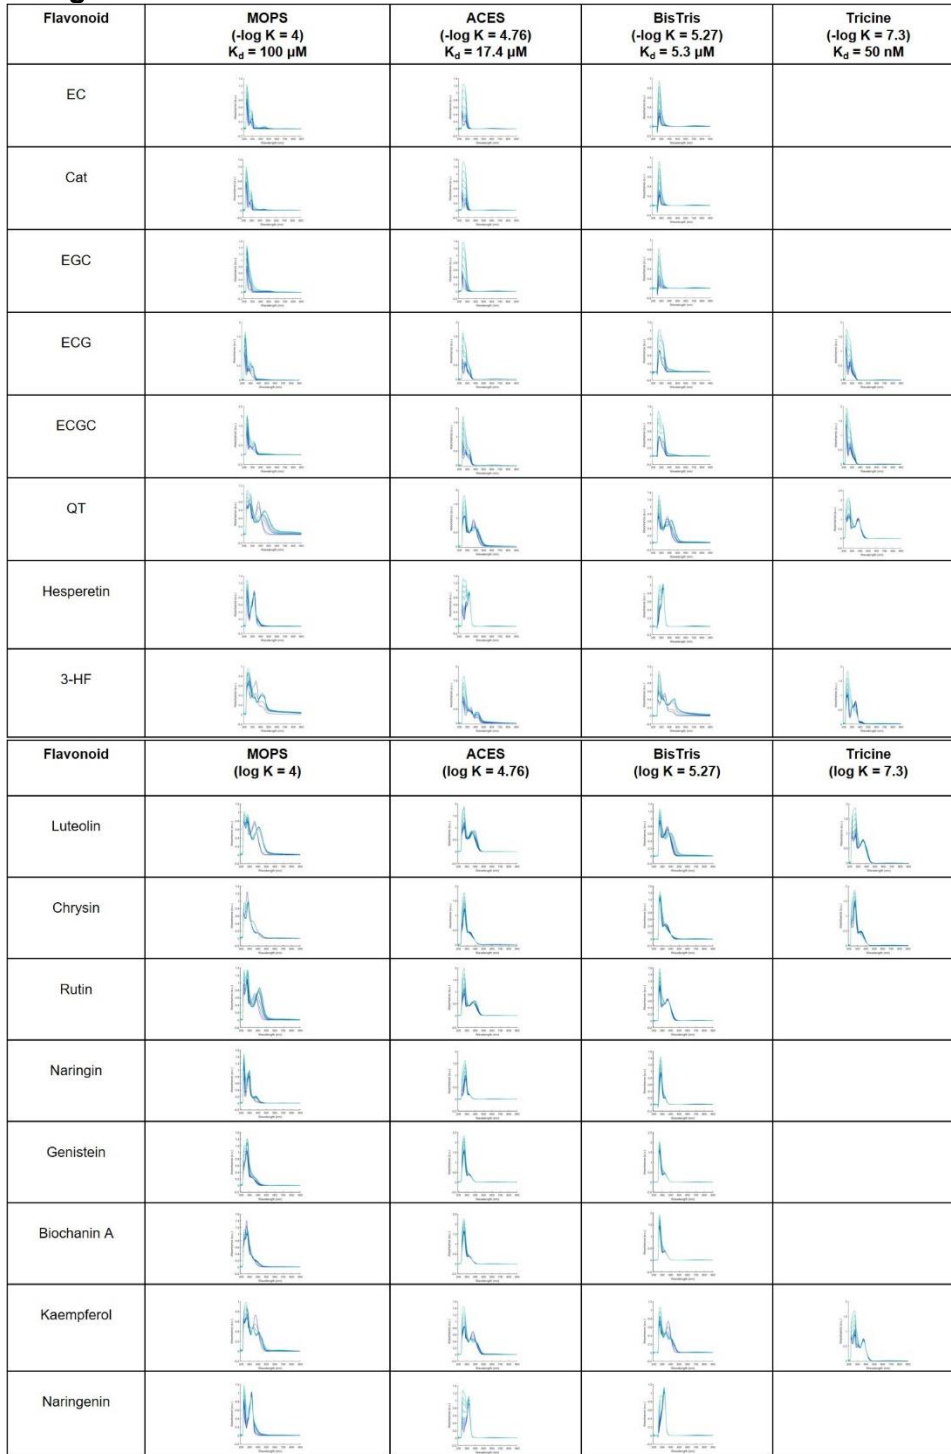

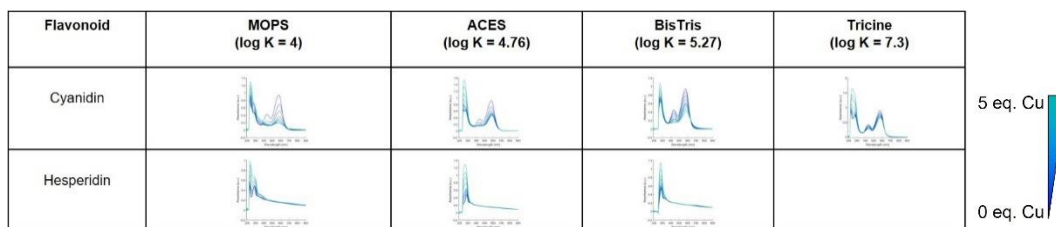

Electronic absorption spectra of flavonoid solutions titrated with CuSO<sub>4</sub> in buffers MOPS, ACES, BisTris, and Tricine (pH 7.4). Flavonoids were prepared at 50 μM and CuSO<sub>4</sub> was titrated into the solution from 0.2 to 5 molar equivalences.

SI Figure 2.

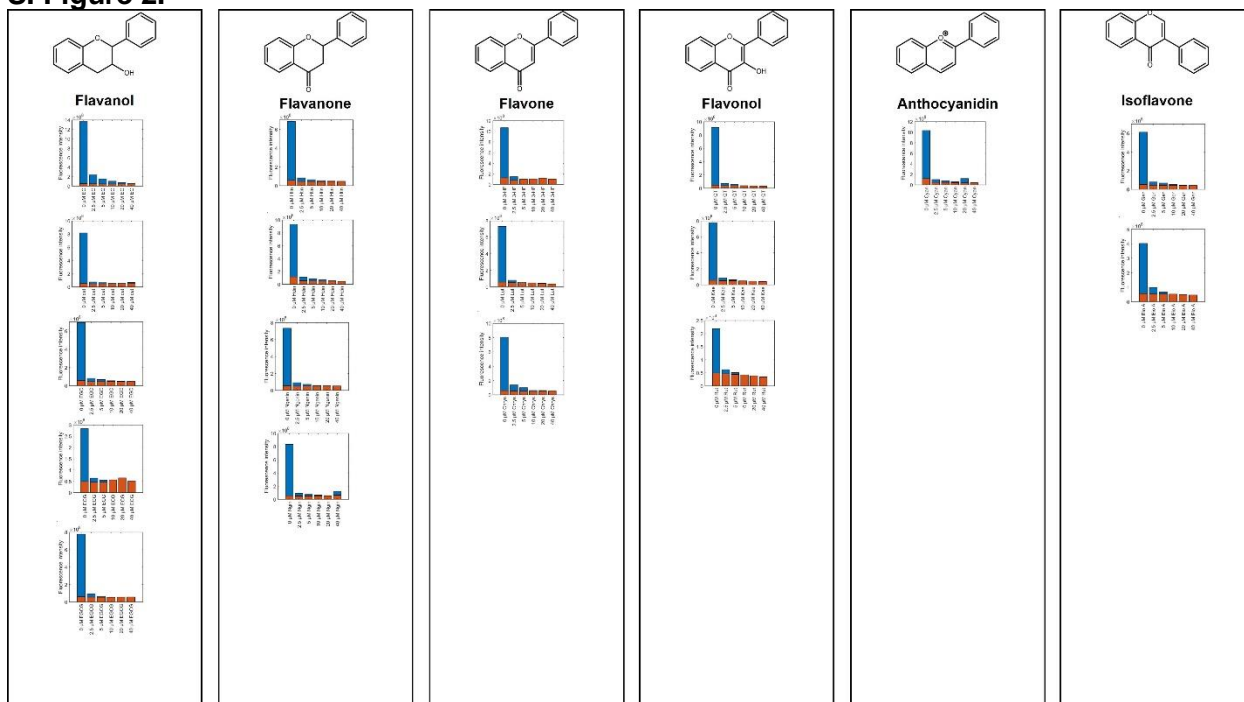

CCA fluorescence intensity measurements for determining the effects of flavonoids on the time-dependent generation of <sup>•</sup>OH. Flavonoid effects were compared to Cu(II) addition alone and with addition of flavonoid. 2.5 mM CCA and 50 μM ascorbic acid were used for all experiments. The calculated area under the curve over the course of 90 minutes was measured for flavonoid solution. Flavonoid effects are shown in the presence (blue) and absence (red) of Cu(II).

SI Figure 3.

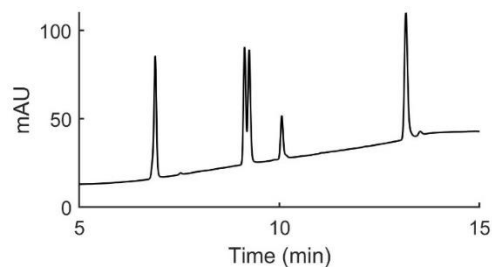

| Elution time (min) | Flavonoid        |
|--------------------|------------------|
| 6.896              | EGCG             |
| 9.129              | Luteolin         |
| 9.244              | Quercetin        |
| 10.058             | Kaempferol       |
| 13.160             | 3-hydroxyflavone |

A mixture of 50  $\mu\text{M}$  flavonoids was prepared in methanol. A gradient liquid chromatography experiment was performed ramping from 90:10  $\text{H}_2\text{O}$ :acetonitrile to 10:90  $\text{H}_2\text{O}$ :acetonitrile. The order of elution supports the relative hydrophobicities reported previously (SI Table 1).

**SI Table 1. Reported log P values of Cu(II)-binding flavonoids**

| Flavonoids | Log P                                     |
|------------|-------------------------------------------|
| EGCG       | 0.46(Arrest and Human 2020)               |
| 3-HF       | 4.17(Pogodaeva et al. 2012)               |
| Luteolin   | 0.7(Quintieri et al. 2008)                |
| QT         | 1.82(Rothwell, Day, and Morgan 2005)      |
| Kaempferol | 1.872(Sreelakshmi, Raj, and Abraham 2017) |

**SI Table 2. Strains of *Saccharomyces cerevisiae* used in this study**

| Strain                      | Genotype                                                                                        | Source  |
|-----------------------------|-------------------------------------------------------------------------------------------------|---------|
| BY4741 WT                   | MATa, his3 $\Delta$ 1, leu2 $\Delta$ 0, met15 $\Delta$ 0, ura3 $\Delta$ 0                       | Horizon |
| BY4741 <i>ctr1</i> $\Delta$ | MATa, his3 $\Delta$ 1, leu2 $\Delta$ 0, met15 $\Delta$ 0, ura3 $\Delta$ 0, <i>ctr1</i> $\Delta$ | Horizon |
| BY4741 <i>ccc2</i> $\Delta$ | MATa, his3 $\Delta$ 1, leu2 $\Delta$ 0, met15 $\Delta$ 0, ura3 $\Delta$ 0, <i>ccc2</i> $\Delta$ | Horizon |

**SI Figure 4.**

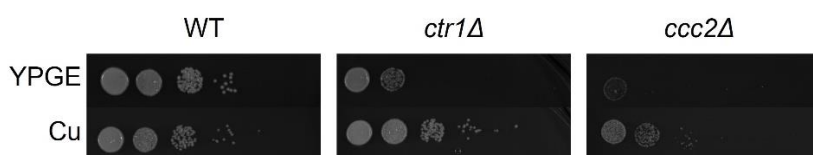

Serially diluted *S. Cerevisiae* strains were spotted on the noted YPGE plates and incubated at 37°C for 4 days before imaging. 10  $\mu\text{M}$   $\text{CuSO}_4$  was supplemented onto YPGE agar plates. Copper treatment rescues growth of both *ctr1* and *ccc2* yeast knockout strains.

**SI Table 3. p-values versus the vehicle control for the MTS assay and ICP-OES analysis**

| Treatment             | MTS assay |        |                       | ICP-OES analysis   |       |         |
|-----------------------|-----------|--------|-----------------------|--------------------|-------|---------|
|                       | mean      | SD     | p-value               | mean               | SD    | p-value |
| Control               | 0.7474    | 0.0891 |                       | 255.8              | 65.78 |         |
| EGCG                  | 1.0251    | 0.1120 | 0.0104                | 159.8              | 54.75 | 0.1238  |
| 3-hydroxyflavone      | 0.8130    | 0.1008 | 0.3669                | 241.1              | 77.30 | 0.8139  |
| Luteolin              | 0.6096    | 0.0735 | 0.0544                | 205.6              | 50.90 | 0.3543  |
| Quercetin             | 0.8473    | 0.0604 | 0.1129                | 192.8              | 39.85 | 0.2290  |
| Kaempferol            | 0.8490    | 0.0680 | 0.1199                | 192.6              | 28.78 | 0.2017  |
| Cu Control            | 0.9208    | 0.0681 |                       | 1.88 $\times 10^3$ | 409.0 |         |
| EGCG + Cu             | 0.9270    | 0.0330 | 0.8753                | 1.86 $\times 10^3$ | 617.7 | 0.9590  |
| 3-hydroxyflavone + Cu | 0.1552    | 0.0148 | 5.83 $\times 10^{-7}$ | 3.94 $\times 10^3$ | 803.3 | 0.0166  |
| Luteolin + Cu         | 0.7399    | 0.0650 | 0.0085                | 1.39 $\times 10^3$ | 544.9 | 0.2824  |
| Quercetin + Cu        | 0.9456    | 0.0600 | 0.6057                | 1.61 $\times 10^3$ | 824.7 | 0.6396  |
| Kaempferol + Cu       | 0.9947    | 0.1237 | 0.3362                | 1.49 $\times 10^3$ | 789.9 | 0.4970  |

**SI Figure 5.**

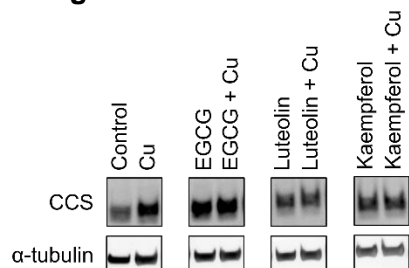

HepG2 cells were stimulated with 20  $\mu$ M flavonoid with and without 50  $\mu$ M CuSO<sub>4</sub> and incubated for 24 hours. Cell lysates were collected and Western blot analysis was performed using antibodies specific for CCS with  $\alpha$ -tubulin as a control.

### References

- Arrest, Cycle, and D U Human. 2020. "Lipophilized Epigallocatechin Gallate Derivative."
- Pogodaeva, N. N., S. A. Medvedeva, B. G. Sukhov, and L. I. Larina. 2012. "Spectroscopic Study of the Reaction of a Natural Arabinogalactan Polysaccharide with 3-Hydroxyflavones in Aqueous Solutions." *Chemistry of Natural Compounds* 48 (5): 723–27. <https://doi.org/10.1007/s10600-012-0368-0>.
- Quintieri, Luigi, Pietro Palatini, Alberto Nassi, Paolo Ruzza, and Maura Floreani. 2008. "Flavonoids Diosmetin and Luteolin Inhibit Midazolam Metabolism by Human Liver Microsomes and Recombinant CYP 3A4 and CYP3A5 Enzymes." *Biochemical Pharmacology* 75 (6): 1426–37. <https://doi.org/10.1016/j.bcp.2007.11.012>.
- Rothwell, Joseph A., Andrea J. Day, and Michael R.A. Morgan. 2005. "Experimental Determination of Octanol-Water Partition Coefficients of Quercetin and Related Flavonoids." *Journal of Agricultural and Food Chemistry* 53 (11): 4355–60. <https://doi.org/10.1021/jf0483669>.
- Sreelakshmi, Vasudevanpillai, Navya Raj, and Annie Abraham. 2017. "Evaluation of the Drug-like Properties of Kaempferol, Chrysophanol and Emodin and Their Interactions with EGFR Tyrosine Kinase - An in Silico Approach." *Natural Product Communications* 12 (6): 915–20. <https://doi.org/10.1177/1934578x1701200621>.
